# Supplementary material
Source: ML conference proceedings conference paper supplement (https://www.ecva.net/papers/eccv_2020/papers_ECCV/html/123720171_ECCV_2020_paper.php)
Supplement: Supplementary file 1 [file 123720171-supp.pdf]

# Learn distributed GAN with Temporary Discriminators - Appendix

## 1 Training algorithm of TDGAN

The training algorithm and communication details between the central generator and distributed discriminators of TDGAN are shown in Algorithm 1.

## 2 Loss function of TDGAN

$$\begin{aligned}
 V_t(G_t, D_t^{1:K_t}) &= \min_{G_t} \text{Digesting Loss} + \lambda \cdot \text{Reminding Loss} \\
 \text{Digesting Loss} &\triangleq \max_{D_t^{1:K_t}} \sum_{k=1}^{K_t} \pi_t^k \mathbb{E}_{y \sim g_t^k(y)} \{ \mathbb{E}_{x \sim p(x|y)} [\log D_t^k(x, y)] \\
 &\quad + \mathbb{E}_{u \sim \text{unif}(0,1)} [\log(1 - D_t^k(G_t(u, y), y))] \} \\
 \text{Reminding Loss} &\triangleq \mathbb{E}_{y \sim s_{t-1}(y)} \mathbb{E}_{u \sim \text{unif}(0,1)} [\|G_t(u, y) - G_{t-1}(u, y)\|^2]
 \end{aligned} \tag{1}$$

## 3 Missing Proof in Analysis Section

**Lemma 1 (Reminding Loss enforces consistency).** *Suppose  $G_t$  has enough model capacity, the optimal  $G_t$  for loss function:*

$$\min_{G_t} \mathbb{E}_{y \sim s_{t-1}(y)} \mathbb{E}_{u \sim \text{unif}(0,1)} [\|G_t(u, y) - G_{t-1}(u, y)\|^2]$$

given  $G_{t-1}$  is  $G_t(u, y) = G_{t-1}$  for all  $u$  and  $y \in \Omega(s_{t-1}(y))$ .

**Proof:**

$$\begin{aligned}
 &\min_{G_t} \mathbb{E}_{y \sim s_{t-1}(y)} \mathbb{E}_{u \sim \text{unif}(0,1)} [\|G_t(u, y) - G_{t-1}(u, y)\|^2] \\
 &= \min_{G_t} \int_y s_{t-1}(y) \int_u \|G_t(u, y) - G_{t-1}(u, y)\|^2 du dy \\
 &\geq \int_y s_{t-1}(y) \int_u \min_{G_t} \|G_t(u, y) - G_{t-1}(u, y)\|^2 du dy
 \end{aligned}$$

When  $G_t(u, y) = G_{t-1}(u, y)$  for all  $u, y$  the inequality becomes equality. □

**Algorithm 1** Training algorithm of TDGAN at time step  $t$ .

- 
- 1: Initialize  $G_t$  with  $G_{t-1}$  if  $t > 1$ .
  - 2: **for** number of total training iterations **do**  
*// Update online Discriminators*
  - 3: **for** each online node  $k \in [K_t]$  **do**
  - 4:   – Sample minibatch of  $m$  variables  $\{y_1^k, \dots, y_m^k\}$  from  $g_t^k(y)$ .
  - 5:   – Send the minibatch from  $D_t^k$  to  $G_t$ .
  - 6:   – Generate  $m$  fake data from  $G_t$ ,  $\{\hat{x}_1^k, \dots, \hat{x}_m^k\} \sim q_t(\hat{x}|y)$ .
  - 7:   – Send the fake data from  $G_t$  to  $D_t^k$ .
  - 8:   – Update the discriminator  $D_t^k$  by ascending its stochastic gradient:

$$\nabla_{\theta_{D_t^k}} \frac{1}{m} \sum_{i=1}^m \left[ \log D_t^k(x_i^k) + \log(1 - D_t^k(\hat{x}_i^k)) \right].$$

- 9: **end for**  
*// Compute the gradients of  $G_t$  using the digesting loss*
- 10: **for** each online node  $k \in [K_t]$  **do**
- 11:   – Sample minibatch of  $m$  variables  $\{y_1^k, \dots, y_m^k\}$  from  $g_t^k(y)$ .
- 12:   – Send the minibatch from  $D_t^k$  to  $G_t$ .
- 13:   – Generate  $m$  fake data from  $G_t$ ,  $\{\hat{x}_1^k, \dots, \hat{x}_m^k\} \sim q_t(\hat{x}|y)$ .
- 14:   – Send the fake data from  $G_t$  to  $D_t^k$ .
- 15:   – Collect error from  $D_t^k$  for  $G_t$ .
- 16: **end for**
- 17: – Compute gradients on the digesting loss:

$$\nabla_{\theta_{G_t}} \frac{1}{m} \sum_{k=1}^{K_t} \pi_t^k \sum_{i=1}^m \log(1 - D_t^k(\hat{x}_i^k)).$$

*// Compute the gradients using the reminding loss if  $t > 1$*

- 18: **if**  $t > 1$  **then**
- 19:   – Sample minibatch of  $n$  variables  $\{y_1, \dots, y_n\}$  from  $s_{t-1}(y)$ . (We approximate  $s_{t-1}(y)$  by storing the empirical distribution in central server)
- 20:   – Generate  $n$  copies of  $u$  from  $unif(0, 1)$ :  $\{u_1, \dots, u_n\}$ .
- 21:   – Compute gradients on the reminding loss:

$$\nabla_{\theta_{G_t}} \frac{1}{n} \sum_{i=1}^n \|G_t(u_i, y_i) - G_{t-1}(u_i, y_i)\|^2.$$

- 22: **end if**
  - 23: Update  $G_t$  using gradients from both losses.
  - 24: **end for**
- 

**Lemma 2 (Digesting Loss Learns correct distribution).** *Suppose discriminator  $D_t^k, k \in [K_t]$  always behave optimally and let  $q_t(x|y)$  be the distribution of  $G_t(u, y)$ , the the optimal  $G_t(u, y)$  for digesting loss:*

$$\begin{aligned} \min_{G_t} \max_{D_t^{1:K_t}} & \sum_{k=1}^{K_t} \pi_t^k \mathbb{E}_{y \sim g_t^k(y)} \{ \mathbb{E}_{x \sim p(x|y)} [\log D_t^k(x, y)] \\ & + \mathbb{E}_{u \sim unif(0,1)} [\log(1 - D_t^k(G_t(u, y), y))] \} \end{aligned}$$

is  $q_t(x|y) = p(x|y)$  for all  $y \in \Omega(g_t(y))$ .

**Proof:**

Similar to [1], we first analyze the behavior of optimal discriminators w.r.t a fixed generator.

$$\begin{aligned} \max_{D_t^{1:K_t}} \text{Loss}(D_t) &= \max_{D_t^{1:K_t}} \sum_{k=1}^{K_t} \pi_t^k \int_y g_t^k(y) \int_x p(x|y) \log D_t^k(y, x) \\ &\quad + q_t(y|x) \log(1 - D_t^k(y, x)) dx dy \\ &\leq \sum_{k=1}^{K_t} \pi_t^k \int_y g_t^k(y) \int_x \max_{D_t^k} \{p(x|y) \log D_t^k(x, y) + q_t(y|x) \log(1 - D_t^k(x, y))\} dx dy \end{aligned}$$

by setting  $D_t^k(y, x) = \frac{p(x|y)}{p(x|y) + q_t(x|y)}$  for all  $y \in \Omega(g_t^k(y))$  we can make the inequality hold with equality. Given a consistent optimal discriminator in each step of optimization process, the loss function of generator becomes:

$$\begin{aligned} \text{Loss}(G_t) &= \sum_{k=1}^{K_t} \pi_t^k \mathbb{E}_{y \sim g_t^k(y)} \{ \mathbb{E}_{x \sim p(x|y)} [\log D_t^k(x, y)] + \mathbb{E}_{\hat{x} \sim q(x|y)} [\log(1 - D_t^k(x, y))] \} \\ &\iff \\ \text{Loss}(q_t, \gamma) &= \sum_{k=1}^{K_t} \pi_t^k \int_y g_t(y) \int_x p(x|y) \log \frac{p(x|y)}{p(x|y) + q_t(x|y)} \\ &\quad + q_t(x|y) \log \frac{q_t(x|y)}{p(x|y) + q_t(x|y)} dx + \int_x q_t(x|y) - 1 dx dy \end{aligned}$$

where  $\gamma$  is Lagrangian Multiplier for constraint  $\int_x q_t(x|y) dx = 1$ . We have:

$$\begin{aligned} \text{Loss}(q_t, \gamma) &\geq_* \int_y g_t(y) \int_x \min_{q_t} p(x|y) \log \frac{p(x|y)}{p(x|y) + q_t(x|y)} \\ &\quad + q_t(x|y) \log \frac{q_t(x|y)}{p(x|y) + q_t(x|y)} + \gamma q_t(x|y) - \gamma dx dy \end{aligned}$$

Minimizing  $p(x|y) \log \frac{p(x|y)}{p(x|y) + q_t(x|y)} + q_t(x|y) \log \frac{q_t(x|y)}{p(x|y) + q_t(x|y)} + \gamma q_t(x|y)$  requires  $\frac{p(x|y)}{p(x|y) + q_t(x|y)}$  to be constant for all possible value of  $x$  and  $y$ . Such constraint enforces  $p(x|y) = q_t(x|y)$  and  $\gamma = -\log 2$ , which makes inequality  $*$  holds with equality.  $\square$

Above two lemmas describes the behavior of digesting loss and reminding loss separately. In next theorem, we show that the design of loss can work cooperatively when mixed thus the overall loss function leads to a correct global distribution.

**Theorem 1.** *Suppose the generator has enough model capacity to obtain  $q_1(x|y) = p(x|y)$  for all  $y \in g_1(y)$  and the loss  $V_\tau(G_\tau, D_\tau)$  defined in Equation 1 is optimized optimally for each  $\tau \in [t]$ , then  $q_t(x|y) = p(x|y)$  for all  $y \in \Omega_t$ .*

**Proof:**

We will rely on induction for proof of the statement. The statement is true for  $t = 1$  according to our assumption and the fact that  $g_1(y) = s_1(y)$ . Assuming  $q_{t-1}(x|y) = p(x|y)$  for all  $y \in \Omega_{t-1}$ , we will show  $q_t(x|y) = p(x|y)$  for all  $y \in \Omega_t$ . Formally:

$$\begin{aligned}
V_t(G_t, D_t) &= \min_{G_t} \max_{D_t^{1:K_t}} \mathbb{E}_{y \sim g_t(y)} \{ \mathbb{E}_{x \sim p(x|y)} [\log D_t^k(x, y)] \\
&\quad + \mathbb{E}_{u \sim \text{unif}(0,1)} [\log(1 - D_t^k(G_t(u, y), y))] \} \\
&\quad + \lambda \min_{G_t} \mathbb{E}_{y \sim s_{t-1}(y)} \mathbb{E}_{u \sim \text{unif}(0,1)} [\|G_t(u, y) - G_{t-1}(u, y)\|^2] \\
&= \min_{q_t} \int_{y \in \Omega(g_t(y))} \sum_{k=1}^{K_t} \pi_t^k g_t^k(y) \int_x p(x|y) \log \frac{p(x|y)}{p(x|y) + q_t(x|y)} \\
&\quad + q_t(x|y) \log \frac{q_t(x|y)}{p(x|y) + q_t(x|y)} dx dy \\
&\quad + \min_{G_t} \lambda \int_{y \in \Omega_{t-1}} s_{t-1}(y) \int_u \|G_t(u, y) - G_{t-1}(u, y)\|^2 dudy \\
&\geq^* \int_{y \in \Omega(g_t(y))} \sum_{k=1}^{K_t} \pi_t^k g_t^k(y) \int_x \min_{q_t} p(x|y) \log \frac{p(x|y)}{p(x|y) + q_t(x|y)} \\
&\quad + q_t(x|y) \log \frac{q_t(x|y)}{p(x|y) + q_t(x|y)} dx dy \\
&\quad + \lambda \int_{y \in \Omega_{t-1}} s_{t-1}(y) \int_u \min_{G_t} \|G_t(u, y) - G_{t-1}(u, y)\|^2 dudy
\end{aligned}$$

Next we show the inequality  $*$  attains equality if  $q_t(x|y) = p(x|y)$  for all  $y \in \Omega_t$ . First we note that for  $y \in \Omega(g_t(y)) \cap \Omega_{t-1}$  the digesting loss and reminding loss shares the same optimal solution. Note  $G_t(u, y) = G_{t-1}(u, y)$  is equivalent to  $q_t(x|y) = q_{t-1}(x|y)$  since  $G_t$  and  $G_{t-1}$  shares the same random seed  $u$ . We have for  $y \in \Omega(g_t(y)) \cap \Omega_{t-1}$ ,  $q_t(x|y) = q_{t-1}(x|y) = p(x|y)$  due to the inductive assumption for reminding loss. The optimality of  $q_t(x|y) = p(x|y)$  is due to Lemma 2.

Next we have  $q_t(x|y) = p(x|y)$  for  $y \in \Delta\Omega_t$ . For  $y \in \Omega(g_t(y)) - \Omega(s_{t-1}(y))$ ,  $q_t(x|y) = p(x|y)$  according to Lemma 2. For  $y \in \Omega_{t-1} - \Omega(g_t(y))$ ,  $G_t(u, y) = G_{t-1}(u, y)$  according to Lemma 1.  $\square$

## References

1. Goodfellow, I., Pouget-Abadie, J., Mirza, M., Xu, B., Warde-Farley, D., Ozair, S., Courville, A., Bengio, Y.: Generative adversarial nets. In: Advances in neural information processing systems. pp. 2672–2680 (2014)
